# Supplementary material for: A feasible approach to synthesize Cu2O microcrystals and their enhanced non-enzymatic sensor performance
Source: Royal Society of Chemistry journal article supplement (doi:10.1039/c5ra08586a), 2015-01-01
Supplement: c5ra08586a1.pdf [file c5ra08586a1.pdf]

## Supporting Information for

### A feasible approach to synthesize $\text{Cu}_2\text{O}$ microcrystals and their enhanced non-enzymatic sensor performance

Xinmei Liu<sup>a</sup>, Yongming Sui<sup>a,†</sup>, Xinyi Yang<sup>a</sup>, Lina Jiang<sup>a</sup>, Fei Wang<sup>a</sup>, Yingjin Wei<sup>b</sup>, Bo Zou<sup>a,†</sup>

<sup>a</sup>. State Key Laboratory of Superhard Materials, Jilin University, Changchun 130012, China.

<sup>b</sup>. Key Laboratory of Physics and Technology for Advanced Batteries (Ministry of Education), College of Physics, Jilin University, Changchun, 130012, China

#### Corresponding Author

State Key Laboratory of Superhard Materials Jilin University Changchun 130012, China

† E-mail: zoubo@jlu.edu.cn; suiym@jlu.edu.cn

Tel: 86-431-85168882; Fax: 86-431-85168883

#### S1

In the absence of KBr, the concave cubic shape formed at the 2nd min. This concave cubic shape was the final shape, which remains unchanged with the reaction time prolonged.

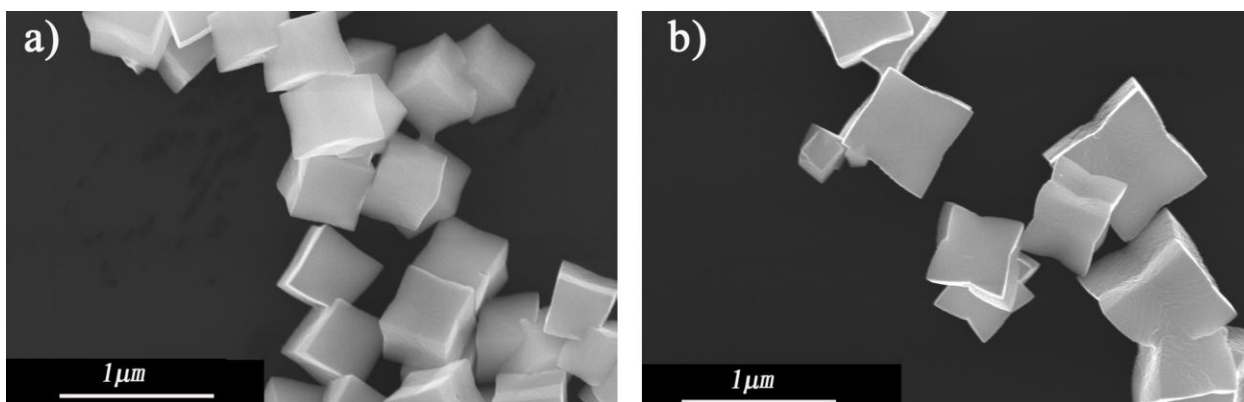

**Figure S1.** FESEM image of the concave cubic  $\text{Cu}_2\text{O}$  microcrystals formed at: a) 2 min; b) 4 min, when no additive was added.

#### S2

As displayed in the Figure S2, the ripening time of  $\text{Cu}_2\text{O}$  increase to 6 min when a small amount of KBr existed. According to the inset images, we can clearly find that the branch of  $\text{Cu}_2\text{O}$  microcrystal begin to appear at the 4th min. And the branch should be derived from the growth of the aggregated nanoparticles via the Ostwald ripening process.

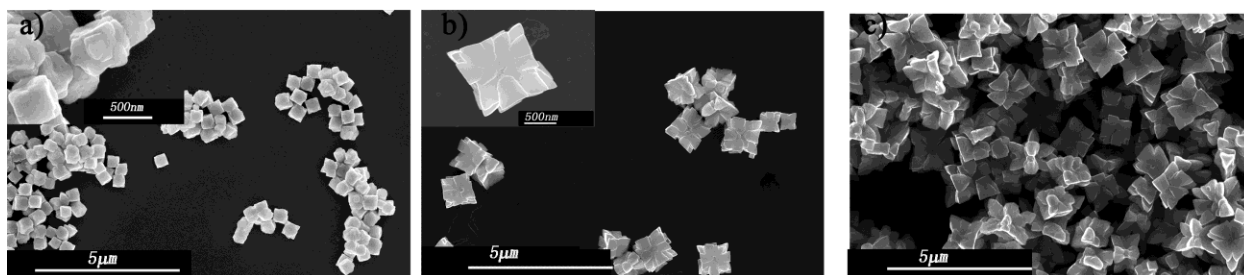

**Figure S2.** FESEM image of the multiple-branched  $\text{Cu}_2\text{O}$  microcrystals formed at: a) 2 min; b) 4 min; c) 6 min, when 0.5 g KBr was added as additive.

S3

As demonstrated in the Figure S3, each branch of the hexapod shape will not extended in the presence of 14.0 g KBr. Nevertheless, as the reaction time prolonged, the entire shape developed into a large one via the Ostwald ripening process. Here, the constant  $C$  equals to the length of  $b$  divided by  $a$  length.

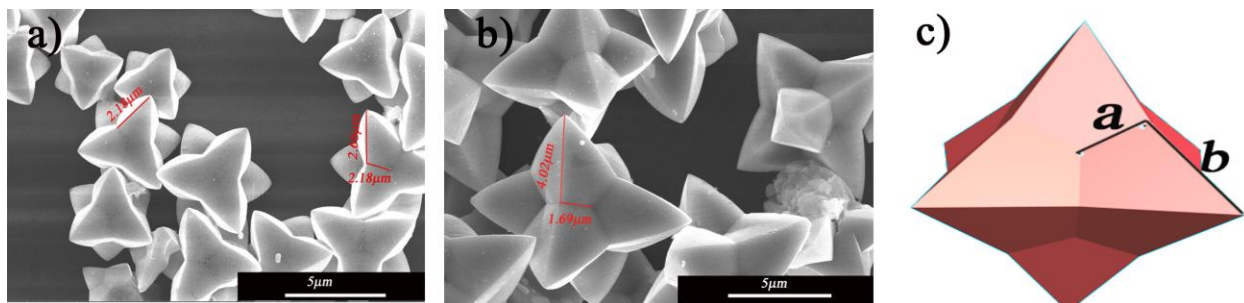

**Figure S3.** FESEM image of the short hexapod  $\text{Cu}_2\text{O}$  microcrystals formed at: a) 2 min; b) 8 min, when 14.0 g KBr was added as additive. c) The illustration model of  $C$ .

S4

Figure S4 displays the concave cubic  $\text{Cu}_2\text{O}$  microcrystals can be obtained in the condition that 5.0 g  $\text{K}_2\text{SO}_4$  as the additive. And this morphology has no obvious change when compared with the image in Figure S1, illustrating that the main causes for the shape evolution of  $\text{Cu}_2\text{O}$  could be attributed to the bromide ions.

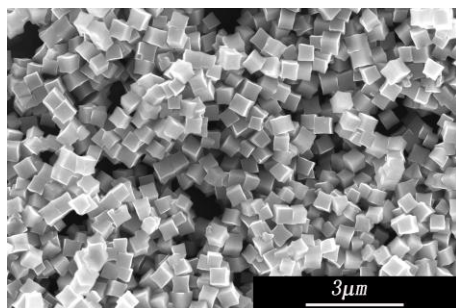

**Figure S4:** FESEM of the  $\text{Cu}_2\text{O}$  microcrystals that 5.0 g  $\text{K}_2\text{SO}_4$  as the additive.

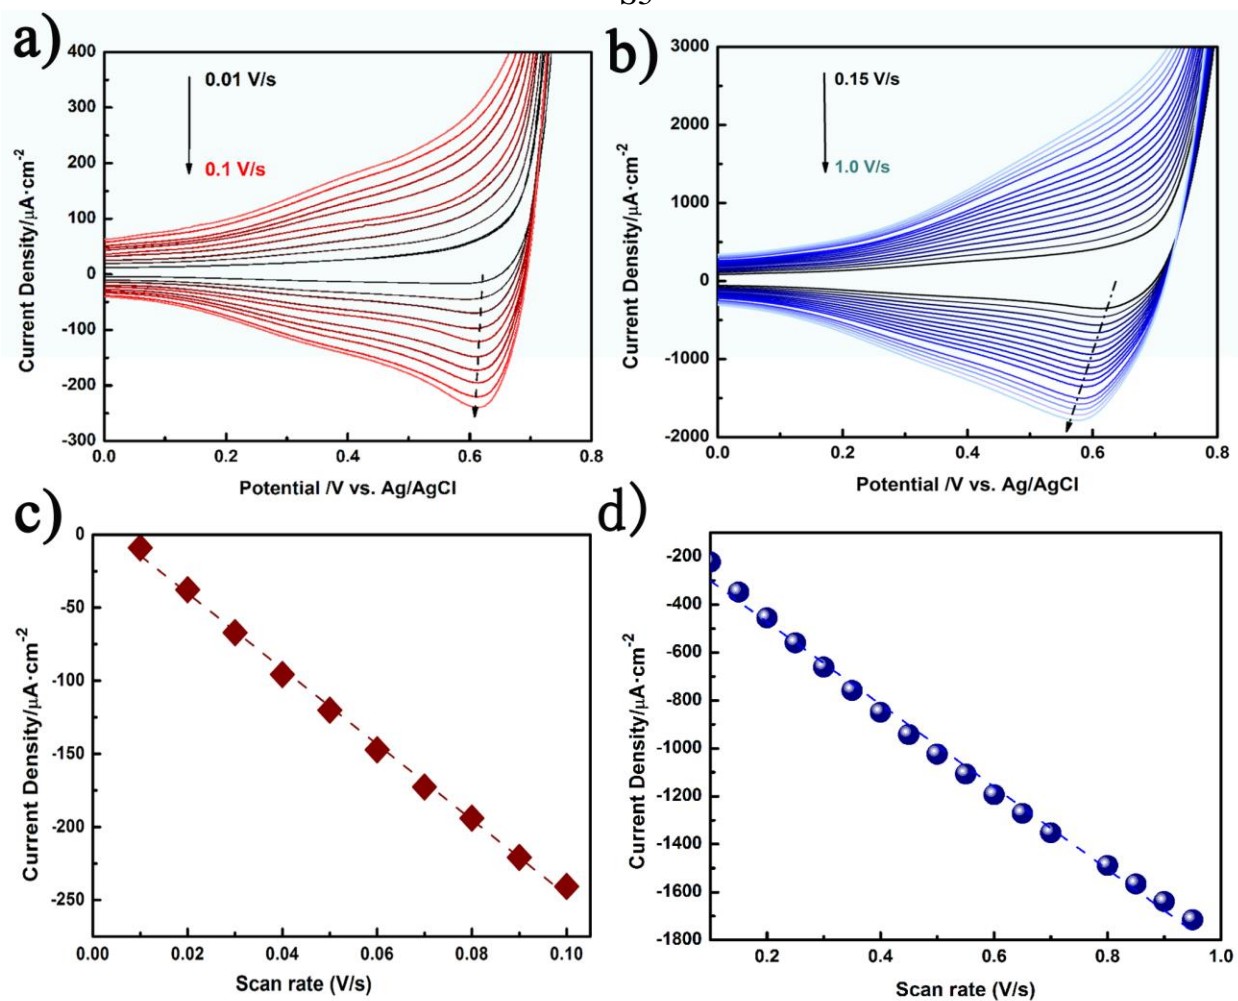

**Figure S5.** CVs of the Electrode C at different scan rates: a) 0.01 -0.1 V/s, b) 0.15 -1.0 V/s; c-d): current density for the reduction peak as a function of their corresponding potential scan rate. From the Figure S5, we can find that the currents density of reduction peak increased linearly with the scan rate, from 0.01 V/s to 1.0V/s, indicating that electron transfer of the Electrode C in the alkaline condition is controlled by surface adsorption.

**Table S1.** Summarize of the sensitivities ( $\mu\text{A}/\text{mM cm}^2$ ) for each measurement.

|        |   | 1     | 2   | 3     | AVERAGE | STDEV |
|--------|---|-------|-----|-------|---------|-------|
| Sample | A | 83    | 96  | 104   | 94.3    | 10.6  |
| Sample | B | 117.6 | 108 | 122.6 | 116.1   | 7.42  |
| Sample | C | 96    | 89  | 106   | 97      | 8.54  |
| Sample | D | 78    | 103 | 96    | 92.3    | 12.9  |

**Table S2.** Summarize of the detection ranges (mM) for each measurement.

|        |   | 1    | 2    | 3    | AVERAGE | STDEV |
|--------|---|------|------|------|---------|-------|
| Sample | A | 10.5 | 10.5 | 10   | 10.33   | 0.29  |
| Sample | B | 9.0  | 9.0  | 8    | 8.7     | 0.58  |
| Sample | C | 14.0 | 15.0 | 14.0 | 14.3    | 0.58  |
| Sample | D | 10.5 | 10.5 | 11   | 10.6    | 0.29  |

S6:

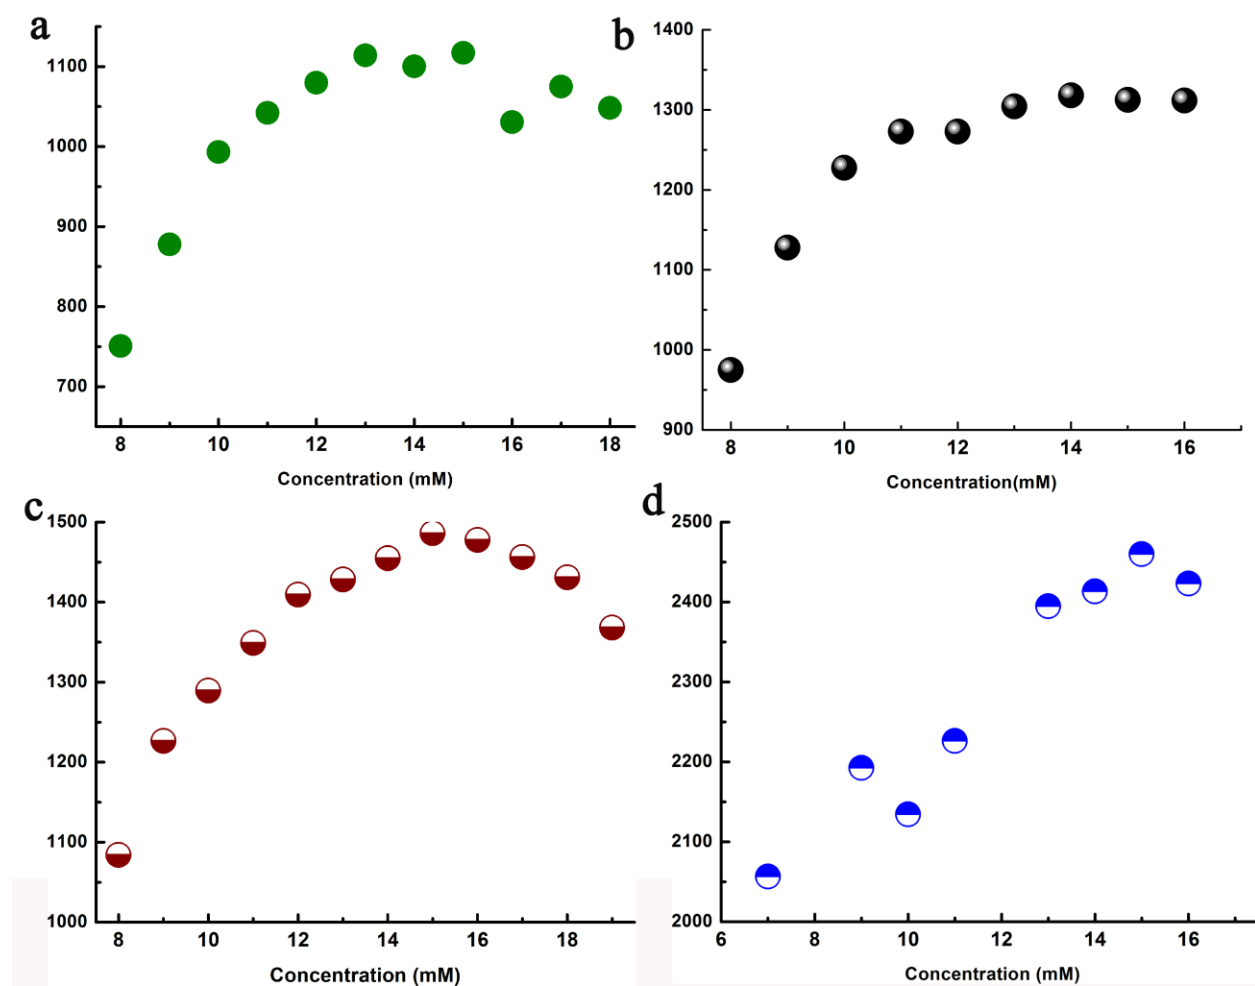

**Figure S6:** High resolution of the insets in Figure 4.

S7:

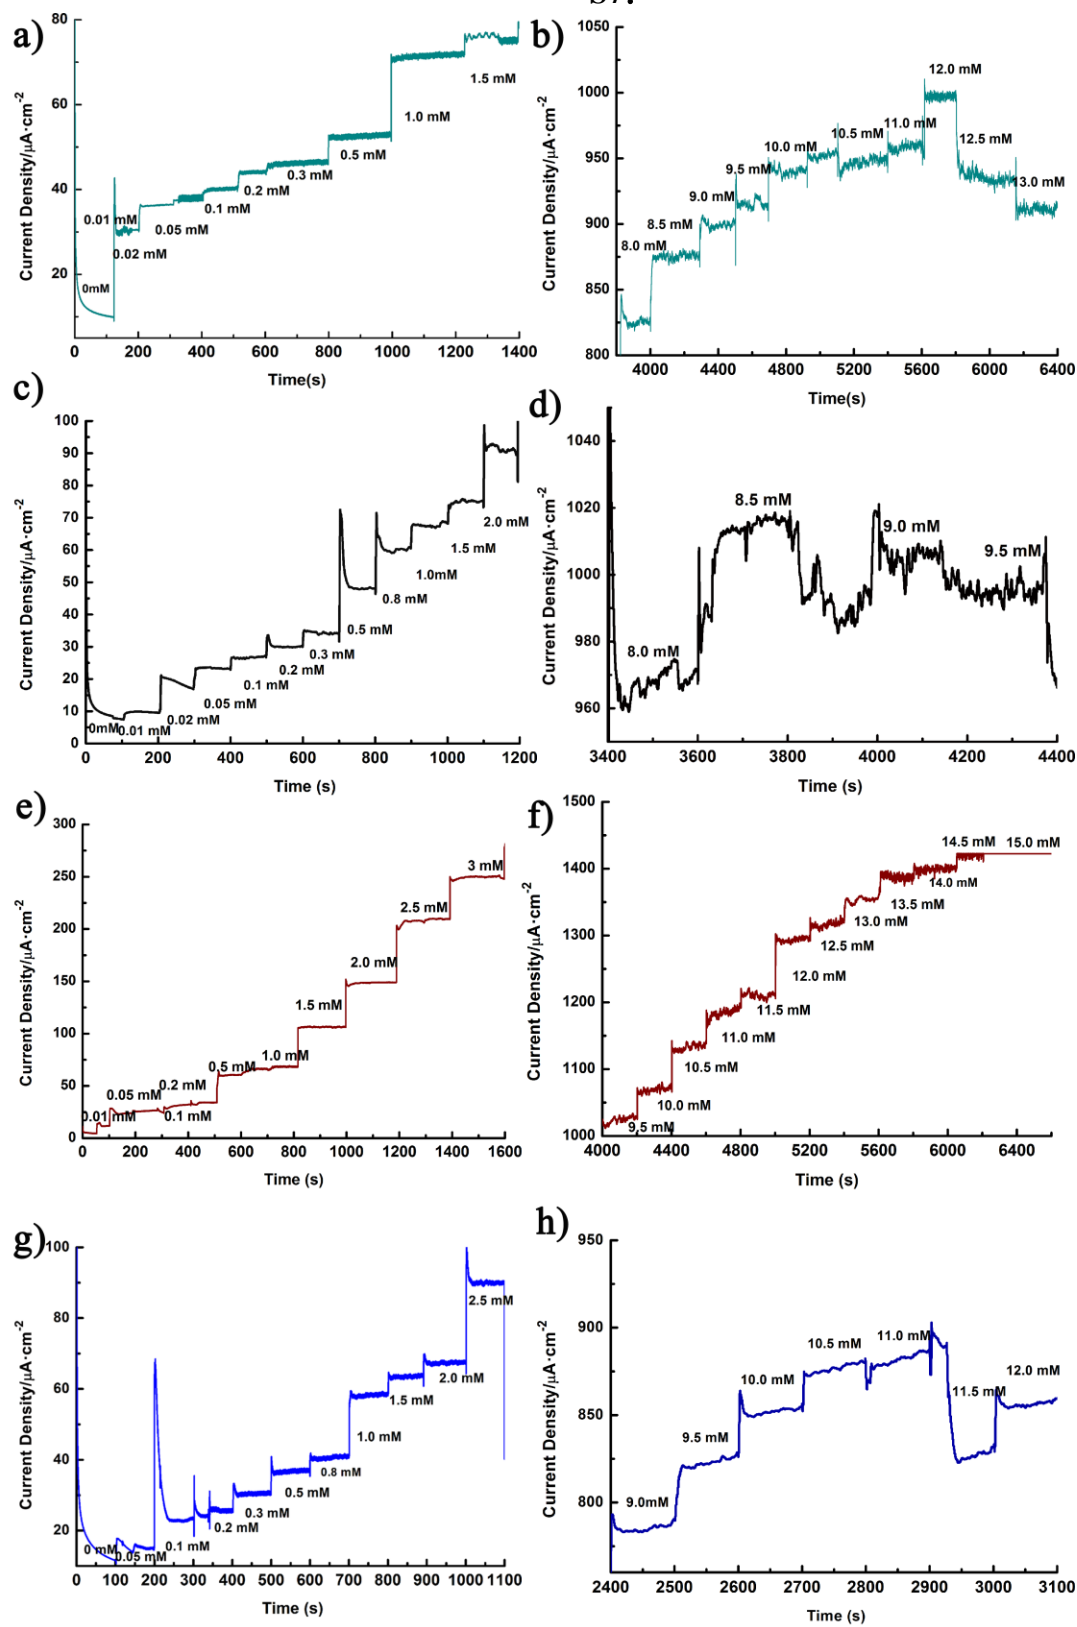

Figure S7: High resolution of the insets in Figure 5.

S8:

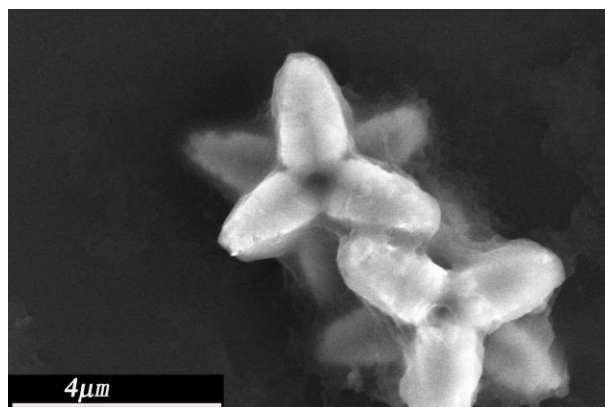

**Figure S8.** A typical FESEM image of the Cu<sub>2</sub>O microcrystals rinsed from the electrode modified by Sample C after the glucose detection.

S9:

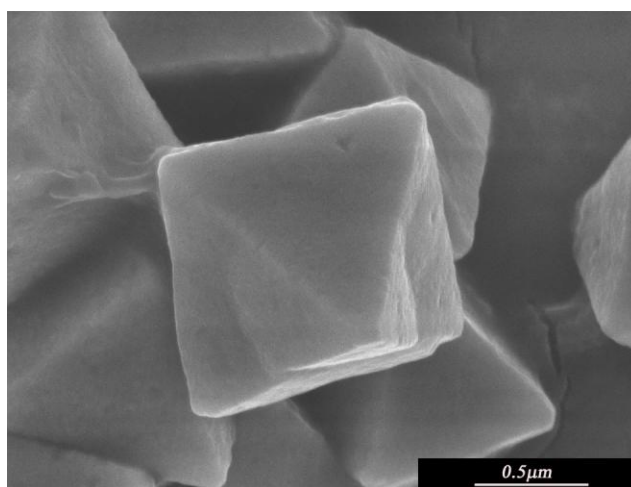

**Figure S9.** FESEM image of the obtained Cu<sub>2</sub>O microcrystals by using PVP as the surfactant.

S10

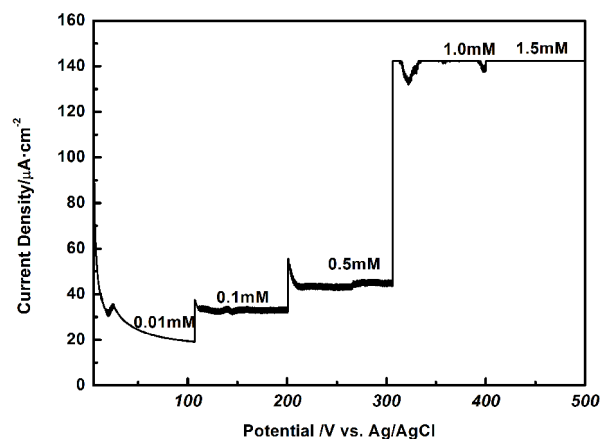

**Figure S10.** Amperometric responses of the present electrode modified by Sample E, which at potential of +0.6 V with increase the concentration of glucose.

S11:

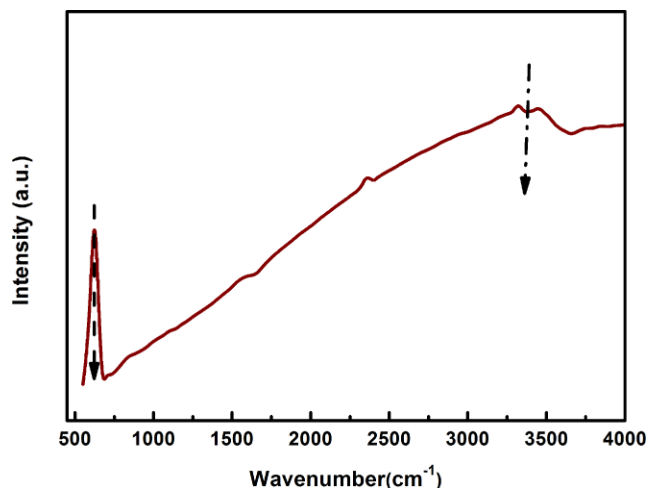

**Figure S11.** Mid-IR absorption spectrum of the short hexapod  $\text{Cu}_2\text{O}$  microcrystals.

As shown in Figure S11, two major peaks appeared in the spectrum of the short hexapod  $\text{Cu}_2\text{O}$  microcrystals. The peak at  $617\text{ cm}^{-1}$  corresponds to the vibrational mode of Cu–O in  $\text{Cu}_2\text{O}$ ,<sup>1</sup> and peak at  $3300\text{--}3500\text{ cm}^{-1}$  corresponds to the water which results from the ambient condition. From the analysis above, we can conclude that a “clean surface”  $\text{Cu}_2\text{O}$  was obtained by our route.

1. B. Balamurugan, B. Mehta, *Thin Solid Films* 2001, **396**, 90-96.
